# Supplementary material for: A Dry Powder Platform for Nose-to-Brain Delivery of Dexamethasone: Formulation Development and Nasal Deposition Studies
Source: MDPI journal article supplement (doi:10.3390/pharmaceutics13060795), 2021-05-26
Supplement: s1 [file s1]

# Supplementary Materials: A Dry Powder Platform for Nose-To-Brain Delivery of Dexamethasone: Formulation Development and Nasal Deposition Studies

Laura Nižić Nodilo, Ivo Ugrina, Drago Špoljarić, Daniela Amidžić Klarić, Cvijeta Jakobušić Brala, Mirna Perkušić, Ivan Pepić, Jasmina Lovrić, Vesna Saršon, Maša Safundžić Kučuk, Dijana Zdravec, Livije Kalogjera and Anita Hafner

**Table S1.** Parameters and their levels included in experimental design.

| Formulation Parameters                            | Low (-1) | Medium (0) | High (+1) |
|---------------------------------------------------|----------|------------|-----------|
| DSP concentration, DSP (%; <i>w/w</i> )           | 0.02     | 0.11       | 0.2       |
| Hypromellose concentration, HPMC (%; <i>w/w</i> ) | 0.2      | 0.6        | 1.0       |
| Process parameters                                | Low (-1) | Medium (0) | High (+1) |
| Inlet air temperature, $T_{\text{inlet}}$ (°C)    | 120      | 140        | 160       |
| Feed flow rate, FFR (g min <sup>-1</sup> )        | 2.5      | 3.5        | 4.5       |

**Table S2.** Validation parameters of HPLC method employed for DSP and DB analysis.

| Range of linearity |                                                   |             |          |                                |           |          |
|--------------------|---------------------------------------------------|-------------|----------|--------------------------------|-----------|----------|
| DSP                | 1–15 µg/mL                                        |             |          |                                |           |          |
| DB                 | 1–15 µg/mL                                        |             |          |                                |           |          |
| Linearity          |                                                   |             |          |                                |           |          |
|                    | regression equation*                              |             |          | correlation coefficient        |           |          |
| DSP                | y = 35033x – 18226                                |             |          | 0.998                          |           |          |
| DB                 | y = 52032x - 12208                                |             |          | 0.999                          |           |          |
| Precision Data     |                                                   |             |          |                                |           |          |
|                    | repeatability (RSD %)                             |             |          | intermediate precision (RSD %) |           |          |
|                    | low                                               | medium      | high     | low                            | medium    | high     |
|                    | 2 µg/mL                                           | 7.5 µg/mL   | 15 µg/mL | 2 µg/mL                        | 7.5 µg/mL | 15 µg/mL |
| DSP                | 1.2                                               | 1.3         | 1.2      | 1.5                            | 0.9       | 0.8      |
| DB                 | 1.3                                               | 1.6         | 1.0      | 1.2                            | 1.4       | 1.1      |
| Accuracy Data      |                                                   |             |          |                                |           |          |
|                    | accuracy (recovery, mean (%) ± RSD, <i>n</i> = 3) |             |          |                                |           |          |
|                    | low                                               | medium      |          | high                           |           |          |
|                    | (2 µg/mL)                                         | (7.5 µg/mL) |          | (15 µg/mL)                     |           |          |
| DSP                | 103.0 ± 0.6                                       | 100.0 ± 0.5 |          | 99.8 ± 0.2                     |           |          |
| DB                 | 99.5 ± 1.3                                        | 96.2 ± 1.2  |          | 100.4 ± 0.8                    |           |          |
| Sensitivity        |                                                   |             |          |                                |           |          |
|                    | LOD (µg/mL)                                       |             |          | LOQ (µg/mL)                    |           |          |
| DSP                | 0.65                                              |             |          | 1.98                           |           |          |
| DB                 | 0.63                                              |             |          | 1.91                           |           |          |

\*x—concentration (µg/mL); y—Area under Curve (µV s); All measurements were performed in triplicate.

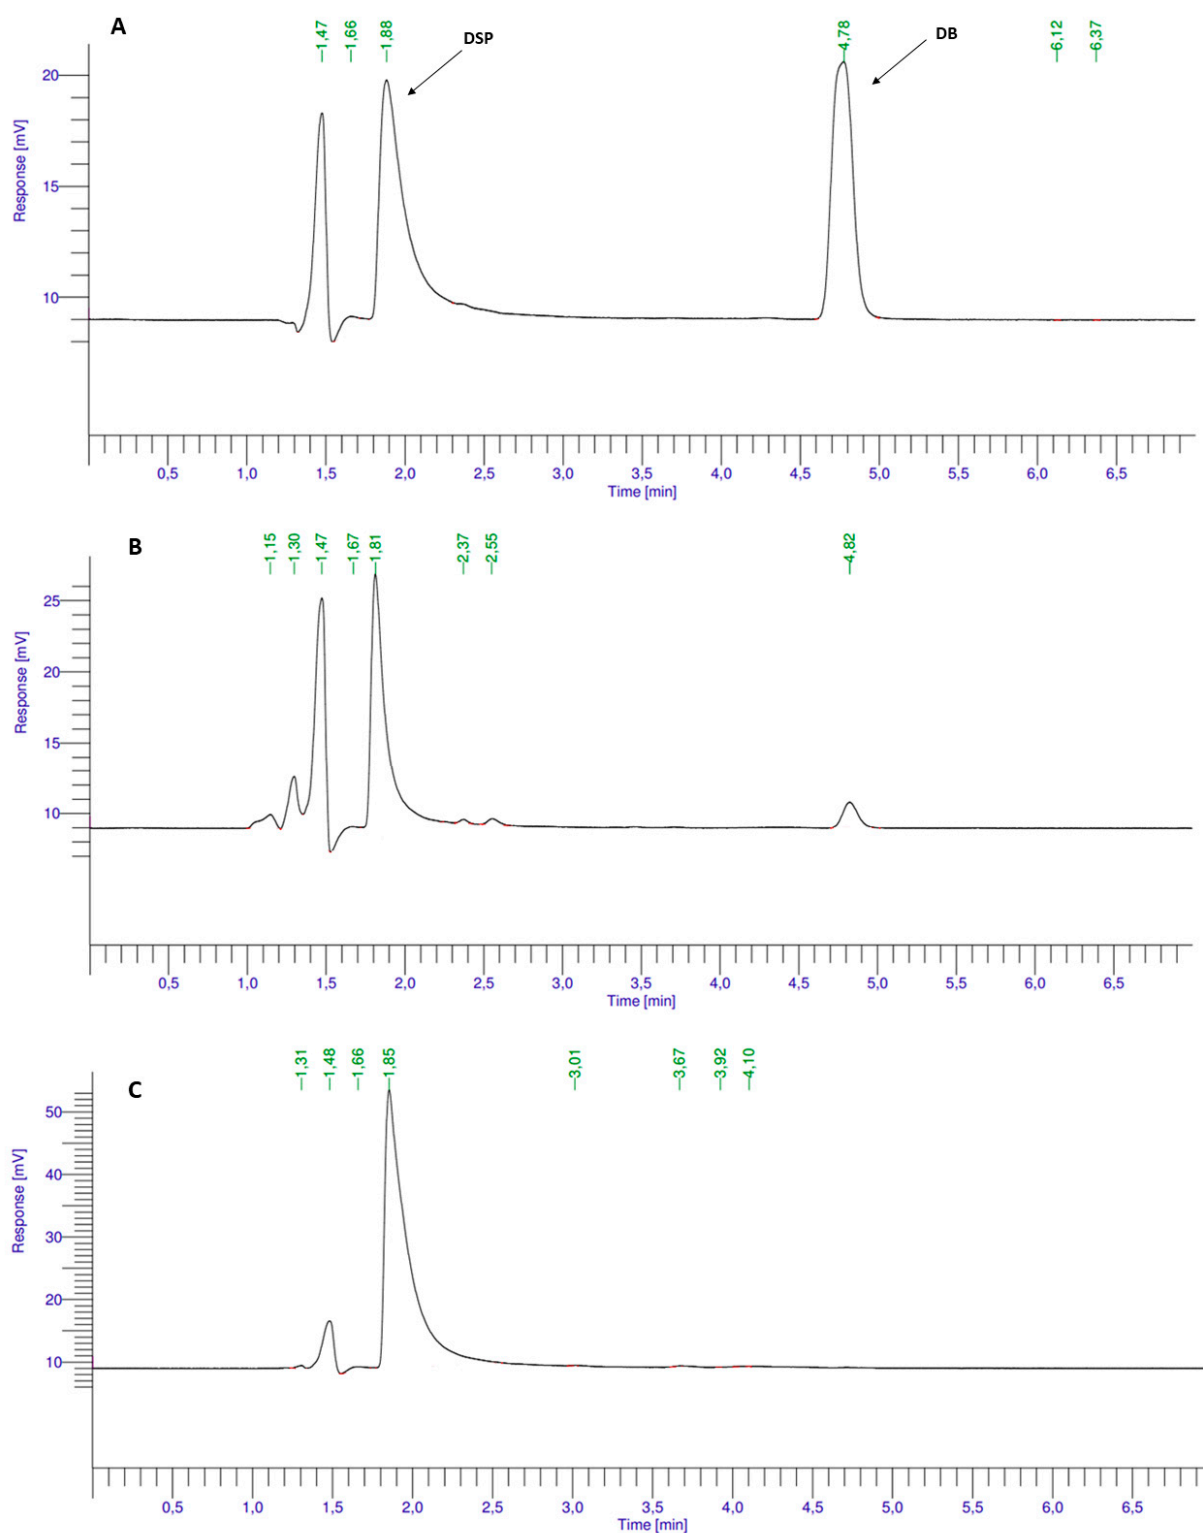

**Figure S1.** Chromatogram of (A) standard dexamethasone sodium phosphate (DSP) and dexamethasone base (DB) solution (both at  $2 \mu\text{g mL}^{-1}$ ), (B) sample of receptor medium taken during DSP permeability study from DSP powder formulation across Calu-3 cell monolayer, (C) eluate obtained by rinsing of the nasal cavity segment within nasal deposition studies of DSP powder formulation. All chromatograms were recorded at wavelength of 241 nm.
